## A Distinct Nasal Microbiota Signature in Peritoneal Dialysis Patients

Iman Khan<sup>1</sup>, Sylvia Wu<sup>1</sup>, Anika Hudson<sup>1</sup>, Clayton Hughes<sup>1</sup>, Gabriel Stryjniak<sup>1</sup>, Lars F. Westblade<sup>2,3</sup>, Michael J. Satlin<sup>2,3</sup>, Nicholas Tedrow<sup>1</sup>, Anne-Catrin Uhlemann<sup>4</sup>, Colleen Kraft<sup>5</sup>, Darshana M. Dadhania<sup>1,6</sup>, Jeffrey Silberzweig<sup>1,7</sup>, Iwijn De Vlaminck<sup>8</sup>, Carol Li<sup>1</sup>, Vesh Srivatana<sup>1,7\*</sup>, John Richard Lee<sup>1,6\*</sup>

1. Division of Nephrology and Hypertension, Department of Medicine, Weill Cornell Medicine, New York, NY, USA

2. Department of Pathology and Laboratory Medicine, Weill Cornell Medicine, New York, NY, USA

3. Division of Infectious Diseases, Department of Medicine, Weill Cornell Medicine, New York, NY, USA

4. Division of Infectious Diseases, Department of Medicine, Vagelos College of Physicians and Surgeons Columbia University, New York, NY

5. Division of Infectious Diseases, Department of Medicine, Emory University School of Medicine, New York, NY

6. Department of Transplantation Medicine, New York Presbyterian Hospital–Weill Cornell Medical Center, New York, NY, USA

7. The Rogosin Institute, New York, NY, USA

8. Department of Biomedical Engineering, Cornell University, Ithaca, NY, USA

Abstract word count: 299

Manuscript body word count: 2938

\* V.S. and J.R.L. contributed equally to this work

Correspondence to Dr. Vesh Srivatana, [ves2009@nyp.org](mailto:ves2009@nyp.org), or Dr. John R. Lee, [jrl2002@med.cornell.edu](mailto:jrl2002@med.cornell.edu)

26 **Authors' Contributions.** IK, ACH, VS, and JRL designed the study. IK, VS, and JRL collected  
27 samples and clinical metadata. AH, CH, and CL processed specimens and performed experiments.  
28 IK, SW, GS, LFW, MJS, NT, ACH, CK, DMD, JS, VS, IDV, and JRL collected and analyzed  
29 data. IK, SW, GS, LFW, MJS, ACH, CK, DMD, JS, IDV, VS, and JRL wrote the manuscript. All  
30 authors read and approved the final manuscript.

31

32 **Funding.** This study was supported in part by R21AI164093 (JRL, IDW).

33

34 **Financial Disclosure.** DMD, JRL, and IDV hold patent US-2020-0048713-A1 titled “Methods  
35 of Detecting Cell-Free DNA in Biological Samples” licensed to Eurofins Viracor. LFW has  
36 received or receives research support from Accelerate Diagnostics, Inc., bioMérieux, Inc., Hardy  
37 Diagnostics, and Roche Molecular Systems, Inc., and consulting fees from Roche Molecular  
38 Systems, Inc., Shionogi, Inc., and Talis Biomedical. MJS reports research support from Merck,  
39 Biomérieux, and SNIPRBiome, compensation for consulting from Shionogi, and compensation  
40 for participation in a Data and Safety Monitoring Board from AbbVie. CK is a consultant for  
41 Rebiotix/Ferring and on the Scientific Advisory Board of Seres Therapeutics. DMD serves as a  
42 consultant for CareDx and is a site clinical investigator for studies sponsored by AlloVir and  
43 CSL Behring. JS is the Co-Chair of the American Society of Nephrology Workgroup on  
44 COVID-19 and other Emerging Threats and of the American Society of Nephrology Emergency  
45 Partnership Initiative and has received consulting fees from Alkahest, Bayer, Honeywell, Kaneka  
46 and St. Gobain. IDV is a member of the Scientific Advisory Board of Karius Inc., Kanvas  
47 Biosciences and GenDX. VS reports receiving speakers' fees from Baxter Healthcare. JRL

48 received research support under an investigator-initiated research grant from BioFire

49 Diagnostics, LLC. JRL receives speakers' fees from Astellas.

50

51 **Acknowledgments.** We thank Dr. Manikkam Suthanthiran for his overall guidance in this

52 project.

53

54

## ABSTRACT

55  
56  
57  
58  
59  
60  
61  
62  
63  
64  
65  
66  
67  
68  
69  
70  
71  
72  
73  
74  
75  
76  
77

**Rationale & Objective.** The nasal passages harbor both commensal and pathogenic bacteria. In this study, we sought to characterize the anterior nasal microbiota in PD patients using 16S rRNA gene sequencing.

**Study Design.** Cross-sectional.

**Setting & Participants.** We recruited 32 PD patients, 37 kidney transplant (KTx) recipients, 22 living donor/healthy control (HC) participants and collected anterior nasal swabs at a single point in time.

**Predictors.** We performed 16S rRNA gene sequencing of the V4-V5 hypervariable region to determine the nasal microbiota.

**Outcomes.** Nasal microbiota profiles were determined at the genus level as well as the amplicon sequencing variant level.

**Analytical Approach.** We compared nasal abundance of common genera among the 3 groups using Wilcoxon rank sum testing with Benjamini-Hochberg adjustment. DESeq2 was also utilized to compare the groups at the ASV levels.

**Results.** In the entire cohort, the most abundant genera in the nasal microbiota included:

*Staphylococcus*, *Corynebacterium*, *Streptococcus*, and *Anaerococcus*. Correlational analyses revealed a significant inverse relationship between the nasal abundance of *Staphylococcus* and that of *Corynebacterium*. PD patients have a higher nasal abundance of *Streptococcus* than KTx recipients and HC participants. PD patients have a more diverse representation of *Staphylococcus* and *Streptococcus* than KTx recipients and HC participants. PD patients who concurrently have or who developed future *Staphylococcus* peritonitis had a numerically higher

78 nasal abundance of *Staphylococcus* than PD patients who did not develop *Staphylococcus*  
79 peritonitis.

80 **Limitations.** 16S RNA gene sequencing provides taxonomic information to the genus level.

81 **Conclusions.** We find a distinct nasal microbiota signature in PD patients compared to KTx  
82 recipients and HC participants. Given the potential relationship between the nasal pathogenic  
83 bacteria and infectious complications, further studies are needed to define the nasal microbiota  
84 associated with these infectious complications and to conduct studies on the manipulation of the  
85 nasal microbiota to prevent such complications.

86

87  
88  
89  
90  
91  
92  
93  
94  
95  
96  
97  
98  
99  
100  
101  
102  
103  
104  
105  
106  
107  
108  
109

## INTRODUCTION

The anterior nasal microbiota is at the interface between the external environment and the nasal passages and contains a combination of commensal and pathogenic bacteria. The most common genera defined in healthy individuals in the Human Microbiome Project are *Staphylococcus*, *Corynebacterium*, *Propionibacterium*, and *Moraxella* (1). Subsequent studies on the nasal microbiota have revealed microbiota dysbiosis in diseased states such as chronic rhinosinusitis (2) and have linked the nasal microbiota to infectious complications after elective surgical procedures (3).

Peritoneal dialysis (PD) patients undergo dialysis through PD catheter through their abdomen. Despite being taught sterile technique, PD patients experience both exit site infections around the catheter and infectious peritonitis. Prior work has established that pathogenic bacteria in the nasal passages may be associated with infectious complications in PD patients. Luzar et al. reported that *Staphylococcus aureus* nasal colonization was associated with exit site infections in a cohort of 140 PD patients (4). Other studies have found that persistent nasal colonization with *S. aureus* was also associated with peritonitis (5, 6). Decolonization with mupirocin has been suggested to prevent infections and the MUPIROCIN Study Group found that nasal mupirocin prevented *S. aureus* exit site infection (7). Despite these data, International Society of Peritoneal Dialysis (ISPD) guidelines do not support the routine use of nasal mupirocin (8).

Because no study to date has comprehensively evaluated the anterior nasal microbiota in PD patients, we performed a pilot study to evaluate the anterior nasal microbiota using 16S rRNA

110 gene sequencing of the V4-V5 hypervariable region in PD patients, in kidney transplant  
111 recipients, and healthy controls.

112

## 113 **METHODS**

114

### 115 *Study Cohort Recruitment and Nasal Swab Specimen Collection*

116

117 From August 2021 to January 2022, we recruited patients receiving peritoneal dialysis (PD),  
118 kidney transplant (KTx) recipients, and living donor/healthy control (HC) participants for  
119 anterior nasal swab specimen collection. All kidney transplant recipients and living donor  
120 candidates were recruited from the clinic. Most PD patients were recruited in the PD clinic;  
121 several were recruited during hospitalization. The Weill Cornell Institutional Review Board  
122 approved this protocol (IRB # 1604017181) and all participants provided written informed  
123 consent.

124

125 Anterior nasal swab specimens were collected once from each participant using the Human  
126 Microbiome Project protocol. A Copan Eswab (Copan Diagnostics, Murietta, CA, USA) was  
127 inserted into the anterior part of one nostril of the participant and turned twice and was then  
128 inserted into the anterior part of the other nostril and turned twice. The Copan Eswab was then  
129 placed into 1 mL of liquid Amies provided by the Copan Eswab technology and immediately  
130 stored on ice or 4°C. Aliquots of 300 uL were created in 2 mL cryovial and stored at -80°C  
131 within 12 hours.

132

133 ***16S rRNA gene sequencing of the V4-V5 hypervariable region***

134

135 A single aliquot of approximately 285  $\mu$ L was deposited into a Qiagen PowerBead glass 0.1 mm  
136 tube. Using a Promega Maxwell RSC PureFood GMO and Authentication Kit (AS1600), 1mL of  
137 CTAB buffer & 20  $\mu$ L of RNase A Solution was added to the PowerBead tube containing the  
138 sample. The sample/buffer was mixed for 10 seconds on a Vortex Genie2 and then incubated at  
139 95°C for 5 minutes on an Eppendorf ThermoMixer F2.0, shaking at 1500 rpm. The tube was  
140 removed and clipped to a horizontal microtube attachment on a Vortex Genie2 (SI-H524) and  
141 vortexed at high-speed for 20 minutes. The sample was removed from the Vortex and  
142 centrifuged on an Eppendorf Centrifuge 5430R at 40°C, 12700 rpm for 10 minutes. Upon  
143 completion, the sample was centrifuged again for an additional 10 minutes to eliminate foam.  
144 The tube was then added to a Promega MaxPrep Liquid Handler tube rack. The Liquid Handler  
145 instrument was loaded with proteinase K tubes, lysis buffer, elution buffer, 1000mL tips, 50mL  
146 tips, 96-sample deep-well plate, and Promega Maxwell RSC 48 plunger tips. The Promega  
147 MaxPrep Liquid Handler instrument was programmed to use 300  $\mu$ L of sample and transfer all  
148 sample lysate into Promega Maxwell RSC 48 extraction cartridge for DNA extraction. Upon  
149 completion, the extraction cartridge was loaded into Promega Maxwell RSC 48 for DNA  
150 extraction & elution. DNA was eluted in 100  $\mu$ L and transferred to a standard 96-well plate.  
151 DNA was quantified using Quant-iT dsDNA High Sensitivity Assay Kit using Promega GloMax  
152 plate reader on a microplate (655087). 16S rRNA library generation followed the protocol from  
153 the Earth Microbiome Project.

154



155 Amplicon libraries were washed using Beckman Coulter AMPure XP magnetic beads. Library  
156 quality & size verification was performed using PerkinElmer LabChip GXII instrument with  
157 DNA 1K Reagent Kit (CLS760673). Library concentrations were quantified using Quant-iT  
158 dsDNA High Sensitivity Assay Kit using Promega GloMax plate reader on a microplate  
159 (655087). Library molarity was calculated based on library peak size & concentration. Libraries  
160 were normalized to 2nM using the PerkinElmer Zephyr G3 NGS Workstation (133750) and  
161 pooled together using the same volume across all normalized libraries into a 1.5mL Eppendorf  
162 DNA tube (022431021). Sequencing was performed on an Illumina MiSeq instrument at loading  
163 concentration of 7 pM with 15% PhiX, paired-end 250 using MiSeq Reagent Kit v2, 500-cycles  
164 (MS-102-2003).

165

### 166 *Bioinformatics Pipeline*

167

168 Demultiplexed raw reads were processed using the Nextflow (9) nf-core (10) ampliseq pipeline  
169 (11), version 2.2.0, with the following parameters: `--profile singularity --input SampleSheet.tsv --`  
170 `FW_primer GTGYCAGCMGCCGCGGTAA --RV_primer CCGYCAATTYMTTTRAGTTT --`  
171 `metadata Metadata.tsv --outdir results --dada_ref_taxonomy silva --ignore_empty_input_files --`  
172 `ignore_failed_trimming --min_frequency 10 --retain_untrimmed --truncLenf 240 --truncLenr 160.`

173 Specifically, reads were trimmed with cutadapt (12), PhiX and quality filtering, read pair  
174 merging, and amplicon sequence variant resolution was performed with DADA2 (13).

175 Subsequent taxonomic assignment was also performed with DADA2, using the Silva reference  
176 database (14), version 138. Sequences that were assigned the families, Chloroplast and  
177 Mitochondria, were removed from downstream analyses.

178

179 ***Biostatistical Analyses***

180

181 The distribution of categorical variables were compared using Fisher’s exact tests. The  
182 distribution of continuous variables were compared using Wilcoxon rank sum tests and to  
183 account for the comparison of multiple taxa, adjusted p values were calculated using Benjamini-  
184 Hochberg adjustment for multiple comparisons. DESeq2 was utilized to detect differences at the  
185 ASV between the groups using Benjamini-Hochberg adjustment. Comparison of correlations  
186 using a correlational matrix was adjusted for multiple comparisons using the Bonferonni method.  
187 All statistical tests were performed using R 4.1.3 in RStudio.

188

189 ***Data Availability***

190 Sequencing data that support the findings of this study will be made available in the database of  
191 Genotypes and Phenotypes (dbGaP) phs002251.v1.p1 after peer-reviewed acceptance. Local  
192 institutional review board approval will be needed to access the data.

193

194

**RESULTS**

195

196 ***Characteristics of the Study Cohort and Nasal Microbial Sequencing***

197

198 The microbiota in the anterior nares was performing using 16S rRNA gene sequencing of the  
199 V4-V5 hypervariable region in 32 PD patients, 37 KTx recipients, 22 HC participants, and 3  
200 negative controls. A total of 1,116,291 reads with assigned taxonomy was obtained in the cohort

201 of 91 participants with a median of 12,713 assigned reads with an interquartile range of 7,132  
202 and 16,018 assigned reads. The number of assigned reads in the 3 negative controls were 146,  
203 308, and 529, below the number in the cohort of participants.

204

205 Table 1 shows the demographics of the participants. In general, the PD patients were older than  
206 the HC participants and similar in age to the KTx recipients. More than 50% of PD patients  
207 performed automated peritoneal dialysis and 15% had current *Staphylococcus* peritonitis or  
208 developed future *Staphylococcus* peritonitis within 10 to 12 months from the nasal specimen  
209 collection (last follow up). Approximately a third of KTx recipients received deceased donor  
210 transplantation and 32% were on trimethoprim/sulfamethoxazole (TMP-SMX) prophylaxis.

211

### 212 ***Anterior Nasal Microbial Diversity Differs Across the Study Cohort***

213

214 Microbial diversity among the study participants was measured at the ASV level using the  
215 Shannon diversity, an index that evaluates the richness and evenness in a community, as well as  
216 Chao1, an index that estimates the total number of ASVs in the specimens. Fig. 1A and B show  
217 box and whisker plots of these diversity indices and reveal that PD patients had a significantly  
218 higher Shannon diversity index and Chao1 diversity index than KTx recipients ( $P < 0.05$ ,  
219 Wilcoxon rank sum test) but similar to the HC participants ( $P > 0.05$ ).

220

### 221 ***Staphylococcus* Abundance Negatively Correlates with *Corynebacterium* Abundance in**

### 222 **Anterior Nasal Specimens**

223

224 We further evaluated the anterior nasal microbiota among the study cohort at the genus level. At  
225 the genus level, the top abundant genera (>1% mean abundance across the cohort) included  
226 *Staphylococcus*, *Corynebacterium*, *Anaerococcus*, *Streptococcus*, unspecified *Neisseriaceae*,  
227 *Moraxella*, *Cutibacterium*, *Peptoniphilus*, and *Finegoldia* (Fig. 2A). We performed a  
228 correlational matrix analysis among each of the genera (Fig. 2B). The relative abundance of  
229 *Staphylococcus* was inversely correlated with that of *Corynebacterium* (Pearson  $r = -0.66$ ,  
230 adjusted P value < 0.10, Benjamini-Hochberg adjustment). The relative abundances of  
231 *Peptoniphilus* was positively associated with that of *Anaerococcus* ( $r=0.52$ , adjusted P value <  
232 0.10) and of *Finegoldia* ( $r=0.27$ , adjusted P value < 0.10). The relative abundance of *Finegoldia*  
233 was positively associated with that of *Anaerococcus* ( $r= 0.60$ , adjusted P value < 0.10). The  
234 relative abundance of Unspecified *Neisseriaceae* was positively associated with that of  
235 *Cutibacterium* ( $r= 0.31$ , adjusted P value < 0.10).

236

### 237 ***Distinct Anterior Nasal Microbiota Define PD Patients and Kidney Transplant Recipients***

238

239 The individual profiles of the top genera in anterior nasal microbiota are shown in the PD  
240 patients, KTx recipients, and HC participants (Fig. 3). Fig. 4 shows box and whisker plots of the  
241 top 9 taxa among the PD patients, the KTx recipients, and the HC participants and Table 2 shows  
242 the comparisons among the groups using Wilcoxon rank sum testing with Benjamini-Hochberg  
243 adjustment. PD patients had a distinctly higher relative abundance of *Streptococcus* than KTx  
244 recipients or HC participants (Adjusted P value < 0.10, Wilcoxon rank sum test, Benjamini-  
245 Hochberg adjustment) (Fig. 4D). PD patients also had lower abundance of unspecified  
246 *Neisseriaceae*, *Moraxella*, *Cutibacterium*, and *Peptoniphilus* than HC participants (Fig. 4G)

247 (Adjusted P value < 0.10). Kidney transplant recipients had a lower abundance of *Moraxella* than  
248 HC participants (Adjusted P value < 0.10). Other than *Streptococcus*, KTx recipients had similar  
249 abundance of the top genera compared to PD patients (Adjusted P value > 0.10).

250

251 In order to gain further insight, we evaluated the taxa at the ASV level. We performed pairwise  
252 DESeq2 between the groups to identify ASVs that were consistently different among the groups.  
253 Fig. 5 shows the significant log<sub>2</sub> fold abundance changes between the groups and SI Tables 1 to  
254 3 reveal the changes in the nasal abundances of the groups. Both PD patients and KTx recipients  
255 had significantly higher nasal abundances of *Staphylococcus* ASV #1 and *Corynebacterium* ASV  
256 #1 and lower abundance of *Anaerococcus* ASV #1 than HC participants (Adjusted p value <  
257 0.10, Benjamini-Hochberg adjustment). PD patients had higher nasal abundance of  
258 *Staphylococcus* ASV #2, *Abiotrophia* ASV #1, and *Porphyromonas* ASV #1 than KTx  
259 recipients or HC participants (Adjusted p value < 0.10).

260

261 ***PD Patients Have a More Diverse Representation of Staphylococcus and Streptococcus than***  
262 ***KTx Recipients and HC Participants***

263

264 To further understand why PD patients have higher microbial diversity, we evaluated the  
265 diversity of ASVs in the most common genera: *Staphylococcus*, *Corynebacterium*, and  
266 *Streptococcus*. There were 61 different *Staphylococcus* ASVs identified in the whole cohort. PD  
267 patients had a significantly higher number of *Staphylococcus* ASVs per specimen than KTx  
268 patients (P=0.03, Wilcoxon rank sum test) and HC participants (P=0.04). There were 95 different  
269 *Corynebacterium* ASVs identified in the whole cohort. PD patients, KTx patients, and HC

270 participants had similar number of *Corynebacterium* ASVs per specimen ( $P>0.10$ ). There were  
271 46 different *Streptococcus* ASVs identified in the whole cohort. PD patients had a significantly  
272 higher number of *Streptococcus* ASVs per specimen than KTx patients ( $P=0.04$ ) and HC  
273 participants ( $P=0.05$ ).

274

### 275 ***Clinical Factors, Outcomes, and the Nasal Microbiota***

276

277 We next evaluated the relationship among the nasal microbiota, clinical factors, and outcomes in  
278 the cohort. There were no significant differences in the nasal abundances of the most common  
279 genera based upon age greater than or equal to 65 years old (SI Table 4). The relative abundance  
280 of *Peptoniphilus* was significantly higher in male patients than in female patients (adjusted P  
281 value  $< 0.10$ ) (SI Table 5). Twelve of the kidney transplant recipients were on TMP-SMX  
282 prophylaxis for *Pneumocystic jirovecii* prophylaxis and 35 were not. There were no significant  
283 differences in the nasal abundance of the most common genera between the kidney transplant  
284 recipients on TMP-SMX and those who were not (SI Table 6). In the PD cohort, 6 PD patients  
285 concurrently had *Staphylococcus* peritonitis or developed future *Staphylococcus* peritonitis  
286 within 10 to 12 months (last follow up) (Staph Peritonitis Group) and 26 PD patients did not (No  
287 Staph Peritonitis Group). The nasal abundance of *Staphylococcus* was higher in the Staph  
288 Peritonitis Group than in the No Staph Peritonitis Group but the difference was not statistically  
289 significant (median abundance 52% vs. 24%, respectively, adjusted P value 0.73). There were no  
290 significant differences in the nasal abundance of the other most common genera between the  
291 *Staph* Peritonitis Group and the No *Staph* Peritonitis Group (SI Table 7).

292

293  
294  
295  
296  
297  
298  
299  
300  
301  
302  
303  
304  
305  
306  
307  
308  
309  
310  
311  
312  
313  
314  
315

## DISCUSSION

This study aimed to describe the anterior nasal microbiota across different groups of patients with kidney disease. We detect a distinct microbial signature in the anterior nares of PD patients compared to KTx recipients and HC participants.

Many of the most common genera in the kidney cohort overlap with those reported in healthy individuals and include *Staphylococcus*, *Corynebacterium*, *Finnegoldia*, and *Cutibacterium* (15, 16). However, there were some distinct differences among the groups. PD patients had a higher nasal abundance of *Streptococcus* than HC participants or KTx recipients. Interestingly, having a higher nasal abundance of *Streptococcus* has been associated with respiratory infections such as bronchiolitis in infants (17). While the most common type of infectious peritonitis is *Staphylococcus* in origin, *Streptococcus* peritonitis also occurs in PD patients. Our study was not able to directly address whether PD patients with nasal abundance of *Streptococcus* is associated with *Streptococcus* peritonitis and/or respiratory viral infections, but such a link would provide the groundwork for novel approaches to manipulate the nasal microbiota to prevent such complications.

In our analysis, we noticed a higher nasal microbial diversity in the PD patients compared to KTx recipients and HC participants. Further analysis showed that part of this increased microbial diversity may be due to a more diverse representation of *Staphylococcus* and *Streptococcus* in PD patients (Fig. 6). This may have interesting implications as prior data suggests that PD patients with *Staphylococcus aureus* colonization had a higher incidence of exit site infections

316 (Ref). In our study, we did find an increased nasal abundance of *Staphylococcus* in PD patients  
317 who had a history of *Staphylococcus* peritonitis and/or developed *Staphylococcus* peritonitis.  
318 While the association was not significant, it could be due to the low number of PD patients in the  
319 PD Staph peritonitis as our study was not powered to detect the differences. At the 16S rRNA  
320 level, we were not able to determine *Staphylococcus* at the species level and this limitation  
321 prevented us to assess this association in more detail.

322  
323 Our data also highlight a strong inverse association between the nasal abundance of  
324 *Staphylococcus* and that of *Corynebacterium*. Interesting mechanistic studies have shown a  
325 complicated relationship between these two taxa, which represent the most common taxa in the  
326 nasal microbiota. One study found that *Corynebacterium* species can secrete antimicrobial  
327 peptides against *Staphylococcus aureus* (18). Another study has shown that *Corynebacterium*  
328 species can decrease the virulence of *S. aureus* (19). Taken together, our data are consistent with  
329 the inverse relationship and suggest potential novel approaches to manipulate the nasal  
330 microbiota. For example, since *Staphylococcus* peritonitis is much more common than  
331 *Corynebacterium* peritonitis, establishing a *Corynebacterium* dominant nasal microbiota may be  
332 preventative of *Staphylococcus* in the nasal passages and possibly decrease the risk for  
333 *Staphylococcus* exit site infection and/or peritonitis.

334  
335 A surprising result is that we did not find an association between the TMP/SMX and nasal  
336 microbiota differences. TMP/SMX has broad coverage against gram positive cocci including  
337 *Staphylococcus* species. There are few studies which have investigated the role of oral antibiotics  
338 on the nasal microbiota and it is possible that intra-nasal antibiotics rather than oral antibiotics



339 may more efficiently impact the nasal microbiota. While our study is limited by the population  
340 size and the cross-sectional nature, our study raises this possibility.

341  
342 There are several limitations to our study. As mentioned prior, we are unable to assess species  
343 level identification via 16S rRNA gene sequencing of the V4-V5 hypervariable region. Future  
344 studies using whole gene 16S rRNA gene sequencing or metagenomic sequencing may provide  
345 better resolution on the intricate intra-species competition between the microbiota, particularly  
346 between *Staphylococcus* species. and *Corynebacterium* species. Given the low biomass of the  
347 nasal microbiota, environmental contamination and/or contamination through the DNA  
348 processing steps could artificially introduce microbiota in our specimens. However, we did  
349 sequence negative controls (Fig. 3) and the most abundant microbiota identified were not the  
350 most common nasal microbiota flora previously reported, suggesting that the nasal microbiota  
351 identified in our cohort was present in higher quantities and distinct. The cross-sectional nature  
352 of our study provides a snapshot of the microbiota across different groups of patients with kidney  
353 disease but does not provide longitudinal changes. Such a longitudinal study may provide more  
354 insight into the relationship between the microbiota and clinical factors and outcomes in the  
355 populations.

356  
357 In conclusion, we provide the first description of a distinct nasal microbiota signature in PD  
358 patients compared to KTx recipients and HC participants. We find a higher abundance of  
359 *Streptococcus* and a more diverse representation of *Staphylococcus* and *Streptococcus* in PD  
360 patients. Given the potential relationship between the nasal bacteria and infectious complications  
361 in PD patients, further studies are needed to define the nasal microbiota associated with these

362 infectious complications and to conduct studies on the manipulation of the nasal microbiota to

363 prevent such complications.

364

365  
366  
367  
368  
369  
370  
371  
372  
373  
374  
375  
376  
377  
378  
379  
380  
381  
382  
383  
384  
385

## REFERENCES

1. Human Microbiome Project C. Structure, function and diversity of the healthy human microbiome. *Nature*. 2012;486(7402):207-14.
2. Chen F, Gao W, Yu C, Li J, Yu F, Xia M, et al. Age-Associated Changes of Nasal Bacterial Microbiome in Patients With Chronic Rhinosinusitis. *Front Cell Infect Microbiol*. 2022;12:786481.
3. Hsiao CJ, Paulson JN, Singh S, Mongodin EF, Carroll KC, Fraser CM, et al. Nasal Microbiota and Infectious Complications After Elective Surgical Procedures. *JAMA Netw Open*. 2021;4(4):e218386.
4. Luzar MA, Coles GA, Faller B, Slingeneyer A, Dah GD, Briat C, et al. Staphylococcus aureus nasal carriage and infection in patients on continuous ambulatory peritoneal dialysis. *N Engl J Med*. 1990;322(8):505-9.
5. Nouwen JL, Fieren MW, Snijders S, Verbrugh HA, and van Belkum A. Persistent (not intermittent) nasal carriage of Staphylococcus aureus is the determinant of CPD-related infections. *Kidney Int*. 2005;67(3):1084-92.
6. Ong LM, Ch'ng CC, Wee HC, Supramaniam P, Zainal H, Goh BL, et al. Risk of Peritoneal Dialysis-Related Peritonitis in a Multi-Racial Asian Population. *Perit Dial Int*. 2017;37(1):35-43.
7. Nasal mupirocin prevents Staphylococcus aureus exit-site infection during peritoneal dialysis. Mupirocin Study Group. *J Am Soc Nephrol*. 1996;7(11):2403-8.

- 386 8. Li PK, Szeto CC, Piraino B, de Arteaga J, Fan S, Figueiredo AE, et al. ISPD Peritonitis  
387 Recommendations: 2016 Update on Prevention and Treatment. *Perit Dial Int.*  
388 2016;36(5):481-508.
- 389 9. Di Tommaso P, Chatzou M, Floden EW, Barja PP, Palumbo E, and Notredame C. Nextflow  
390 enables reproducible computational workflows. *Nat Biotechnol.* 2017;35(4):316-9.
- 391 10. Ewels PA, Peltzer A, Fillinger S, Patel H, Alneberg J, Wilm A, et al. The nf-core framework  
392 for community-curated bioinformatics pipelines. *Nat Biotechnol.* 2020;38(3):276-8.
- 393 11. Straub D, Blackwell N, Langarica-Fuentes A, Peltzer A, Nahnsen S, and Kleindienst S.  
394 Interpretations of Environmental Microbial Community Studies Are Biased by the  
395 Selected 16S rRNA (Gene) Amplicon Sequencing Pipeline. *Front Microbiol.*  
396 2020;11:550420.
- 397 12. Martin M. Cutadapt removes adapter sequences from high-throughput sequencing  
398 reads. *EMBnetjournal.* 2011;17:<https://doi.org/10.14806/ej.17.1.200>.
- 399 13. Callahan BJ, McMurdie PJ, Rosen MJ, Han AW, Johnson AJ, and Holmes SP. DADA2: High-  
400 resolution sample inference from Illumina amplicon data. *Nat Methods.* 2016;13(7):581-  
401 3.
- 402 14. Quast C, Pruesse E, Yilmaz P, Gerken J, Schweer T, Yarza P, et al. The SILVA ribosomal  
403 RNA gene database project: improved data processing and web-based tools. *Nucleic*  
404 *Acids Res.* 2013;41(Database issue):D590-6.
- 405 15. Oh J, Conlan S, Polley EC, Segre JA, and Kong HH. Shifts in human skin and nares  
406 microbiota of healthy children and adults. *Genome Med.* 2012;4(10):77.

- 407 16. Pereira PAB, Aho VTE, Paulin L, Pekkonen E, Auvinen P, and Scheperjans F. Oral and  
408 nasal microbiota in Parkinson's disease. *Parkinsonism Relat Disord*. 2017;38:61-7.
- 409 17. Hasegawa K, Linnemann RW, Mansbach JM, Ajami NJ, Espinola JA, Petrosino JF, et al.  
410 Nasal Airway Microbiota Profile and Severe Bronchiolitis in Infants: A Case-control  
411 Study. *Pediatr Infect Dis J*. 2017;36(11):1044-51.
- 412 18. Menberu MA, Liu S, Cooksley C, Hayes AJ, Psaltis AJ, Wormald PJ, et al. *Corynebacterium*  
413 *accolens* Has Antimicrobial Activity against *Staphylococcus aureus* and Methicillin-  
414 Resistant *S. aureus* Pathogens Isolated from the Sinonasal Niche of Chronic  
415 Rhinosinusitis Patients. *Pathogens*. 2021;10(2).
- 416 19. Ramsey MM, Freire MO, Gabriliska RA, Rumbaugh KP, and Lemon KP. *Staphylococcus*  
417 *aureus* Shifts toward Commensalism in Response to *Corynebacterium* Species. *Front*  
418 *Microbiol*. 2016;7:1230.
- 419  
420

421

**TABLE 1**

| Characteristic                                                     | PD Cohort (n=32)<br>median abundance | KTx Cohort (n = 37)<br>median abundance | HC Cohort (n = 22)<br>median abundance |
|--------------------------------------------------------------------|--------------------------------------|-----------------------------------------|----------------------------------------|
| Age, years                                                         | 63 (51, 73)                          | 59 (52, 67)                             | 51 (33, 61)                            |
| Female Sex                                                         | 20 (63%)                             | 17 (46%)                                | 13 (59%)                               |
| Ethnicity                                                          |                                      |                                         |                                        |
| Hispanic                                                           | 3 (9%)                               | 2 (5%)                                  | 3 (14%)                                |
| Non-Hispanic                                                       | 27 (84%)                             | 33 (89%)                                | 16 (73%)                               |
| Declined                                                           | 2 (6%)                               | 2 (5%)                                  | 3 (14%)                                |
| Race                                                               |                                      |                                         |                                        |
| Asian                                                              | 4 (11%)                              | 4 (11%)                                 | 1 (5%)                                 |
| Black                                                              | 13 (41%)                             | 10 (27%)                                | 5 (23%)                                |
| White                                                              | 11 (34%)                             | 20 (54%)                                | 11 (50%)                               |
| Other                                                              | 3 (9%)                               | 2 (5%)                                  | 1 (5%)                                 |
| Declined                                                           | 1 (3%)                               | 1 (3%)                                  | 4 (18%)                                |
| History of Hypertension                                            | 26 (81%)                             | 36 (97%)                                | 2 (9%)                                 |
| History of Diabetes Mellitus                                       | 9 (28%)                              | 12 (32%)                                | 0 (0%)                                 |
| Years on PD                                                        | 1.2 (0.6, 2.4)                       |                                         |                                        |
| Automated Peritoneal Dialysis                                      | 21 (66%)                             |                                         |                                        |
| Concurrent or Develops Future<br><i>Staphylococcus</i> Peritonitis | 6 (19%)                              |                                         |                                        |
| Decreased Donor Transplantation                                    |                                      | 14 (38%)                                |                                        |
| Days Post Transplantation                                          |                                      | 364 (51, 1637)                          |                                        |
| History of Prior Transplantation                                   |                                      | 4 (11%)                                 |                                        |
| Maintenance Immunosuppression                                      |                                      |                                         |                                        |
| Tacro/mycophenolic mofetil                                         |                                      | 19 (51%)                                |                                        |
| Tacro/mycophenolic mofetil/pred                                    |                                      | 14 (38%)                                |                                        |
| Tacro/mycophenolic acid                                            |                                      | 1 (3%)                                  |                                        |
| Tacro/mycophenolic acid/pred                                       |                                      | 3 (8%)                                  |                                        |
| Trimethoprim/Sulfamethoxazole PPx                                  |                                      | 12 (32%)                                |                                        |

422

423 **Demographics of the Cohort.** Categorical variables are represented by the number followed by the  
424 percentage in parentheses. Continuous variables are represented by the median followed by the  
425 interquartile range in parentheses.

**TABLE 2**

| Genus                  | PD Cohort<br>(n=32) | KTx Cohort<br>(n = 37) | HC Cohort (n<br>= 22) | PD vs. HC    | PD vs. HC    | PD vs. KTx   | PD vs. KTx   | KTx vs. HC   | KTx vs. HC   |
|------------------------|---------------------|------------------------|-----------------------|--------------|--------------|--------------|--------------|--------------|--------------|
|                        | median<br>abundance | median<br>abundance    | median<br>abundance   | P value      | Adj P Value  | P value      | Adj P Value  | P value      | Adj P Value  |
| <i>Anaerococcus</i>    | 0.020               | 0.004                  | 0.014                 | 0.999        | 0.999        | 0.238        | 0.722        | 0.303        | 0.389        |
| <i>Corynebacterium</i> | 0.098               | 0.200                  | 0.127                 | 0.509        | 0.573        | 0.271        | 0.722        | 0.701        | 0.701        |
| <i>Cutibacterium</i>   | 0.000               | 0.000                  | 0.009                 | <b>0.016</b> | <b>0.049</b> | 0.942        | 0.942        | 0.029        | 0.133        |
| <i>Finegoldia</i>      | 0.000               | 0.000                  | 0.001                 | 0.098        | 0.147        | 0.660        | 0.880        | 0.178        | 0.320        |
| <i>Moraxella</i>       | 0.000               | 0.000                  | 0.000                 | <b>0.014</b> | <b>0.049</b> | NA           | NA           | <b>0.008</b> | <b>0.074</b> |
| Unspecified            |                     |                        |                       |              |              |              |              |              |              |
| <i>Neisseriaceae</i>   | 0.000               | 0.000                  | 0.003                 | <b>0.034</b> | <b>0.062</b> | 0.510        | 0.817        | 0.105        | 0.237        |
| <i>Peptoniphilus</i>   | 0.000               | 0.000                  | 0.013                 | 0.022        | <b>0.049</b> | 0.382        | 0.763        | 0.046        | 0.139        |
| <i>Staphylococcus</i>  | 0.249               | 0.403                  | 0.257                 | 0.406        | 0.522        | 0.891        | 0.942        | 0.285        | 0.389        |
| <i>Streptococcus</i>   | 0.027               | 0.005                  | 0.003                 | <b>0.001</b> | <b>0.008</b> | <b>0.003</b> | <b>0.027</b> | 0.584        | 0.657        |

**Comparison of the Nasal Abundance Among the 3 Cohorts at the Genus Level.** The median abundance of the most common genera are shown for the peritoneal dialysis (PD) cohort, the kidney transplant cohort (KTx), and the living donor /healthy control (HC) cohort. P values shown were calculated using Wilcoxon rank sum test between groups. Adjusted P value (Adj P Value) were calculated using Benjamini-Hochberg adjustment. P values with NA were unable to be calculated because the abundances were 0 in both groups.

**FIGURE 1**

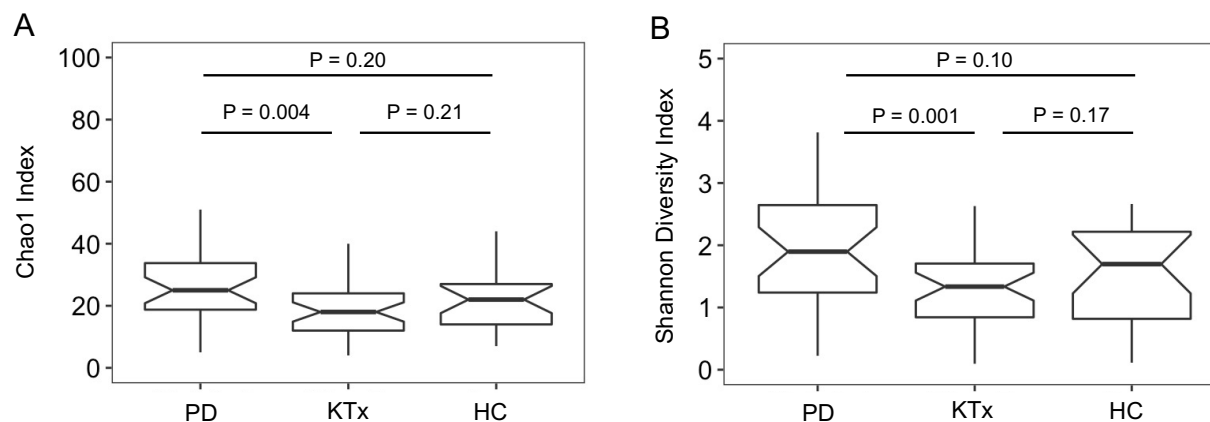

**Distinct Differences in Nasal Microbial Diversity among the Study Cohort.** Panel A shows box and whisker plots of Chao1 index, the estimated number of amplicon sequence variants, in the anterior nasal specimens from the peritoneal dialysis (PD) cohort, the kidney transplant cohort (KTx), and the living donor /healthy control (HC) cohort. The Chao1 index is on the y axis and the study group is on the x-axis. P value shown was calculated by Wilcoxon rank sum test. Panel B shows box and whisker plots of Shannon diversity index, a measure of evenness and richness, in the anterior nasal specimens from the 3 cohorts. The Shannon diversity index is on the y axis and the study group is on the x-axis. P values shown were calculated by Wilcoxon rank sum test.



**FIGURE 2**

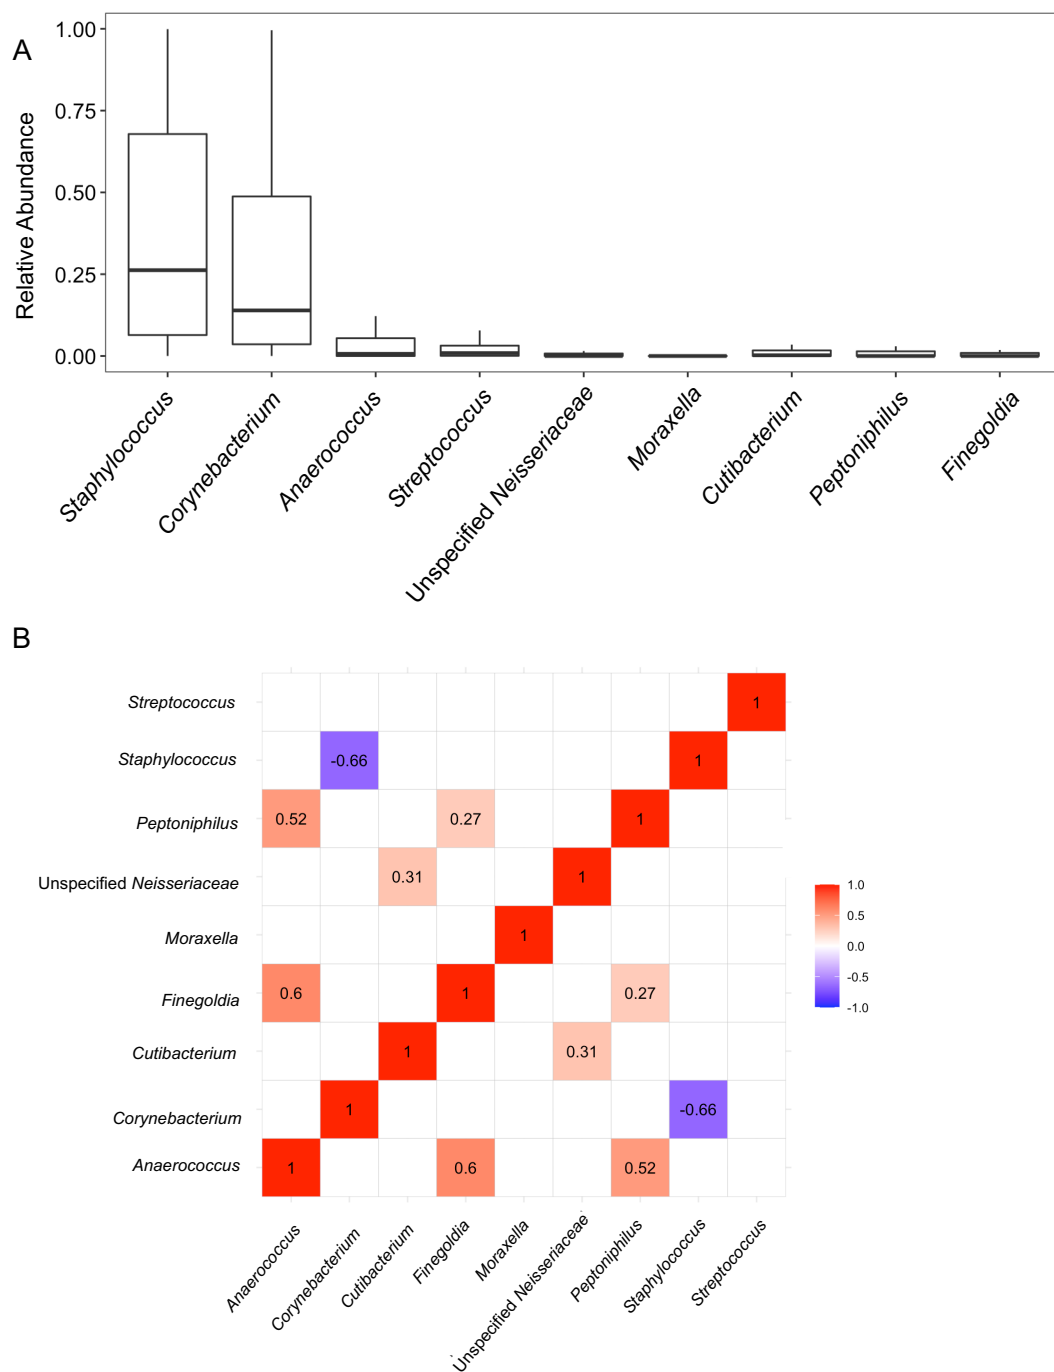

**Significant Correlations among the Most Common Genera in the Study Cohort. Panel A** shows the most common genera in the anterior nasal microbiota (>1% mean relative abundance in the cohort). Box and whisker plots are represented to show the variation in the relative abundance of the genus (y-axis) with the genus on the x-axis. **Panel B** shows a correlational

matrix between the nasal abundance of the most common genera using Pearson's r correlations with Benjamini-Hochberg adjustment for multiple hypotheses. The numbers shown are Pearson's r correlations that had an adjusted P value < 0.10. The color shows the strength of the correlation with red showing a positive correlation between two genera and blue showing a negative correlation between two genera.

FIGURE 3

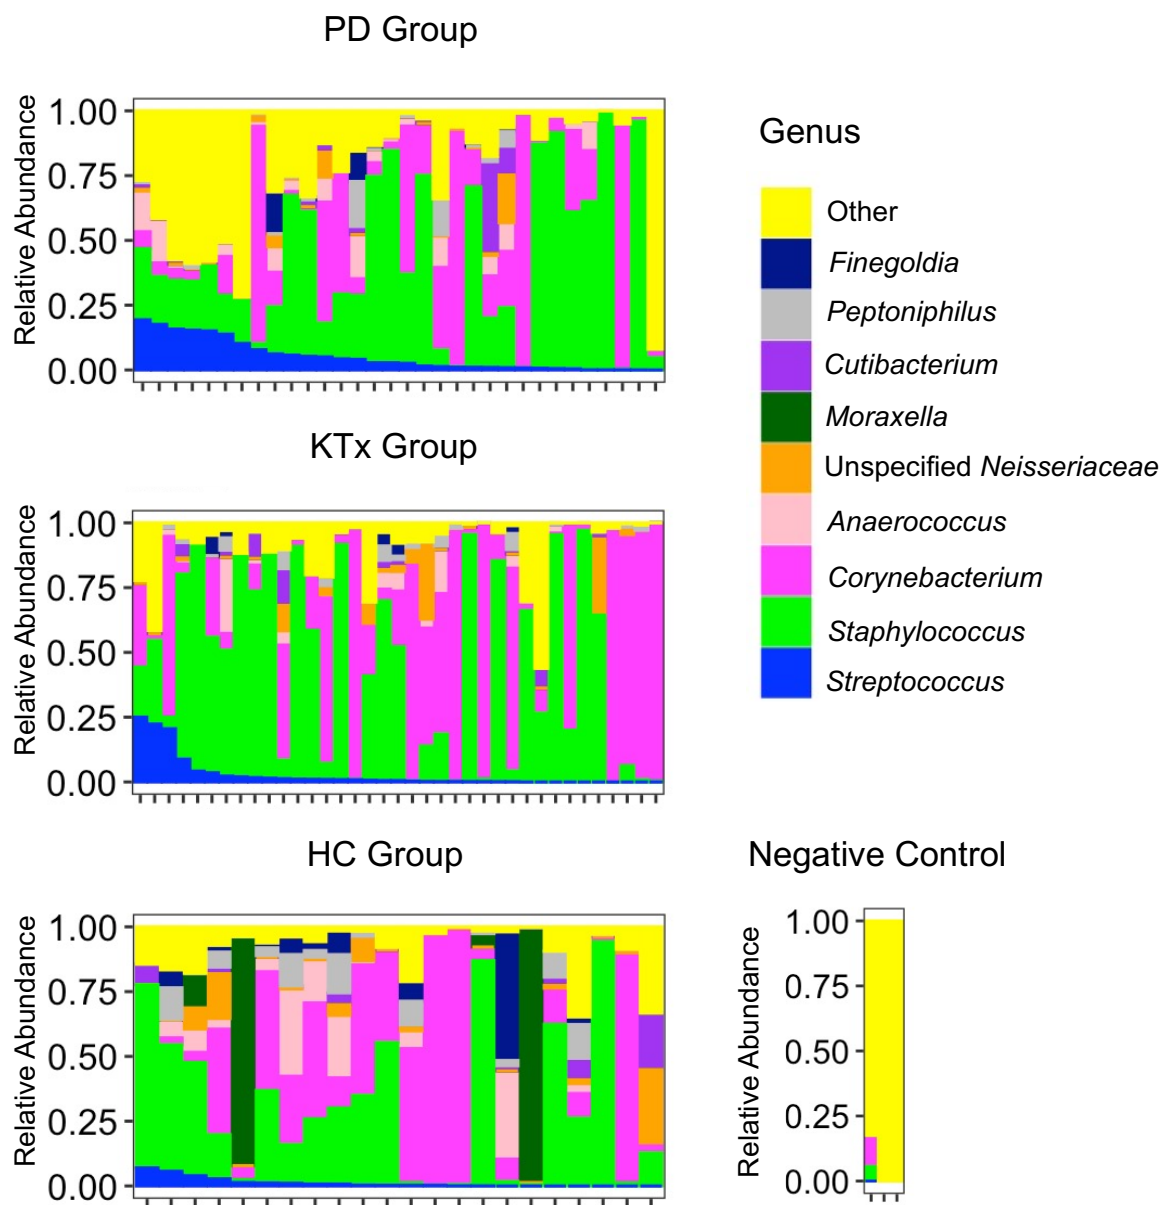

**Individual Microbiota Profiles by the Study Cohort.** The relative abundance of microbiota is on the y axis and individual nasal specimens are on the x-axis. The relative abundance of each genus is represented by color. The top panel represents anterior nasal microbiota profiles from the 32 peritoneal dialysis (PD) patients, the middle panel represents the anterior nasal microbiota profiles from the 37 kidney transplant (KTx) patients, and the bottom panel represents the anterior nasal microbiota profiles from the 22 potential living donor / healthy control (HC) participants. The right panel represents the microbiota from 3 negative controls.

**FIGURE 4**

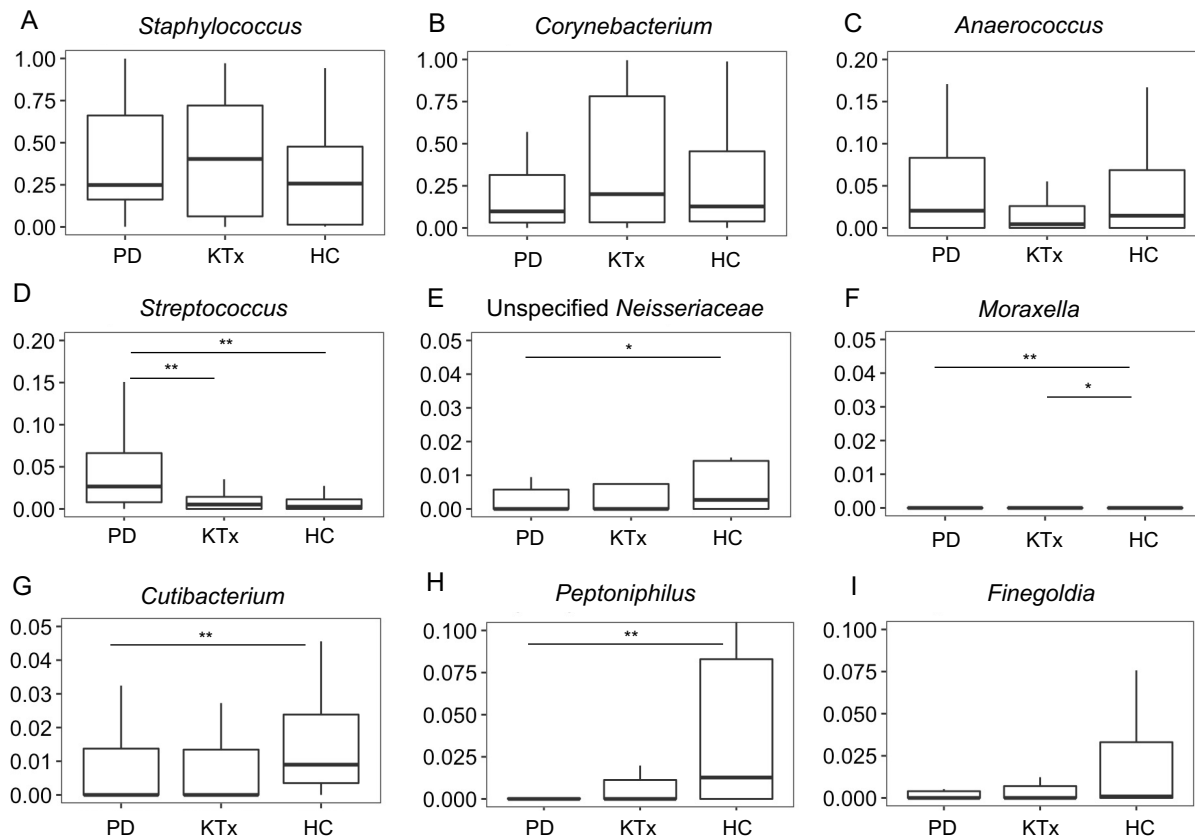

**Distinct microbial differences among the cohort at the genus level.** Box and whisker plots are represented with the relative abundance of individual genera on the y axis and the group on the x axis. PD, peritoneal dialysis cohort (n=32). KTx, kidney transplant cohort (n=37). HC, living donor / healthy control cohort (n=22). P values were calculated using Wilcoxon rank sum testing with Benjamini-Hochberg adjustment for multiple hypothesis. \*\* Adjusted P value < 0.05 \* Adjusted P value < 0.10. **Panel A**, *Staphylococcus* analysis. **Panel B**, *Corynebacterium* analysis. **Panel C**, *Anaerococcus* analysis. **Panel D**, *Streptococcus* analysis. **Panel E**, Unspecified *Neisseriaceae* analysis. **Panel F**, *Moraxella* analysis. **Panel G**, *Cutibacterium* analysis. **Panel H**, *Peptoniphilus* analysis. **Panel I**, *Finegoldia* analysis.

**FIGURE 5**

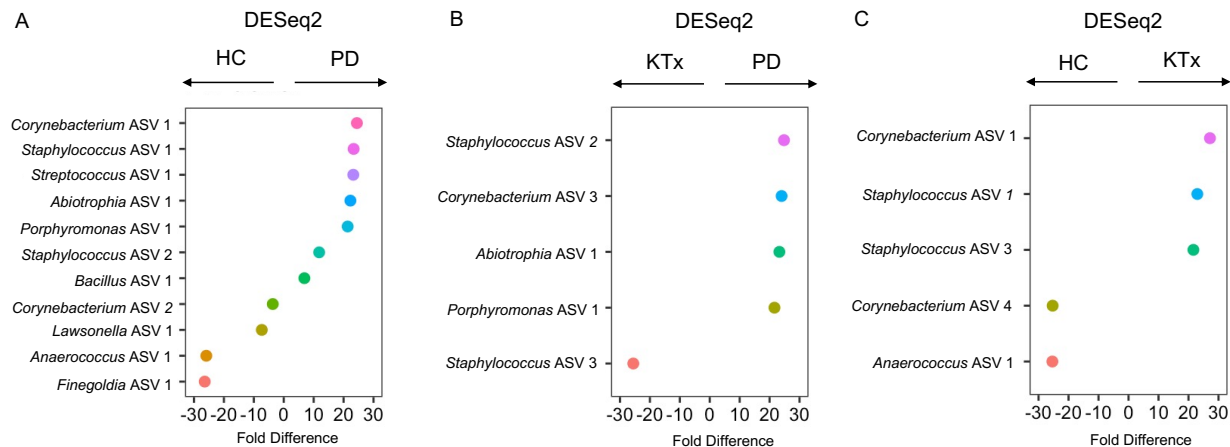

**Differential abundance analyses among the cohort at the amplicon sequence variant level.**

Differential abundance analyses were performed on the anterior nasal microbiota between the groups using DESeq2 with Benjamini-Hochberg adjustment for multiple hypothesis testing. On the y axis is the individual amplicon sequence variant with genus shown and on the x axis is the fold difference in abundance. PD, peritoneal dialysis cohort. KTx, kidney transplant cohort. HC, living donor / healthy control cohort. The fold difference directionality is represented above the graph. **Panel A** represents differential abundance analyses between the HC Group and the PD Group. **Panel B** represents differential abundance analyses between the KTx Group and the PD Group. **Panel C** represents differential abundance analyses between the HC Group and the KTx Group.

**FIGURE 6**

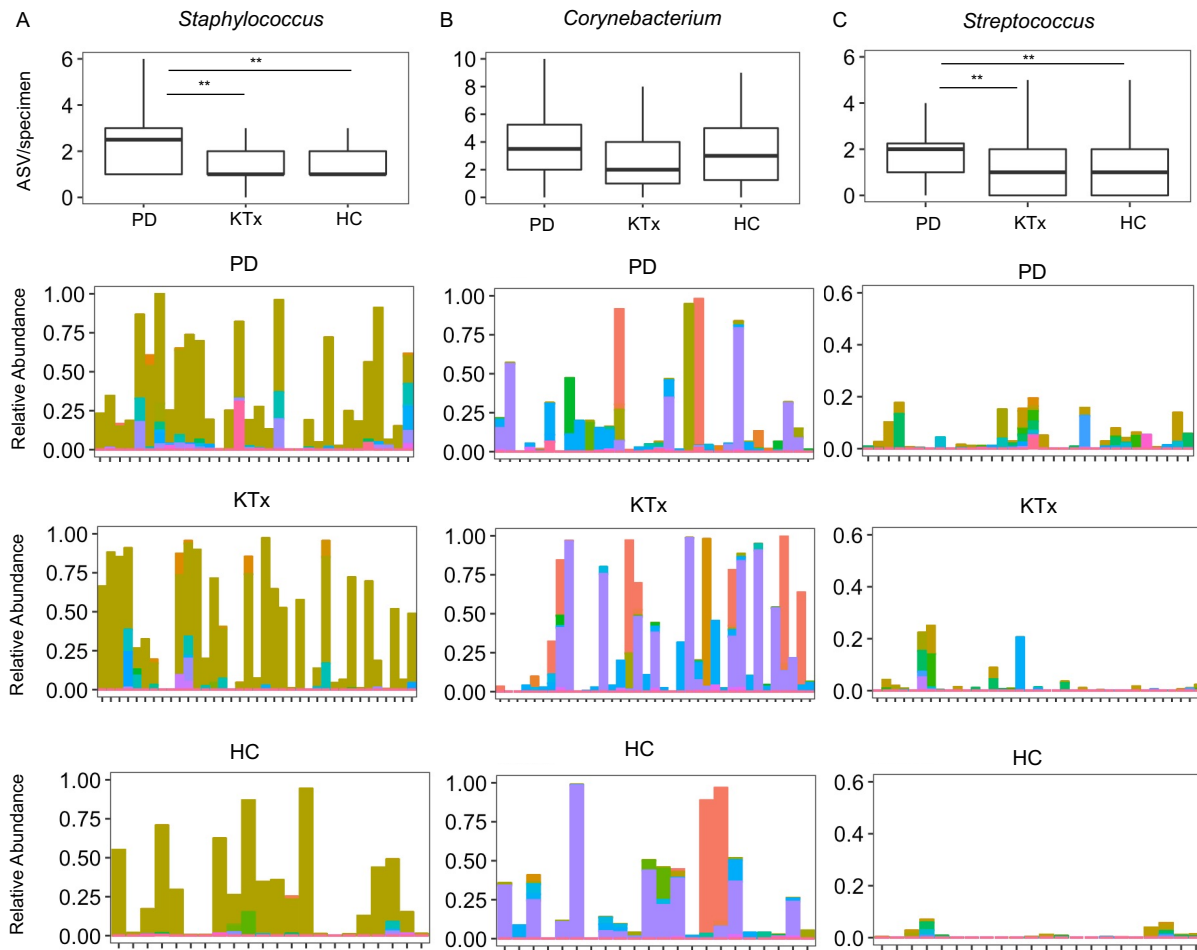

**Diverse representation of the most common genera in the study cohort.** Each set of graphs represents the number of amplicon sequence variant (ASV) from a particular genus by group. PD, peritoneal dialysis group (n=32). KTx, kidney transplant group (n=37). HC, living donor / healthy control group (n=22). The top graph presents box and whisker plots of the number of ASVs per specimen by group. P value was calculated using Wilcoxon rank sum test: \*\* P value < 0.05 \* P value < 0.10. The bottom 3 graphs represent box and whisker plots of the relative abundance of individual ASVs from a particular genus. The relative abundance is on the y axis with the color representing individual ASVs and anterior nasal specimens are on the x axis with the second top graph representing the PD Cohort, the second bottom graph representing the KTx Cohort, and the bottom graph representing the HC Cohort. **Panel A** shows the diversity of *Staphylococcus* ASVs in the study cohort. **Panel B** shows the diversity of *Corynebacterium* ASVs in the study cohort. **Panel C** shows the diversity of *Streptococcus* ASVs in the study cohort.

**SI Table 1**

| <i>Genus</i>                  | ASV                              | Base Mean | log <sub>2</sub> Fold Change | Standard error | Wald stat | P value | Adj P value |
|-------------------------------|----------------------------------|-----------|------------------------------|----------------|-----------|---------|-------------|
| <i>Finegoldia ASV #1</i>      | 1f016ec26e4774c86f029301b556de28 | 24.3      | -26.4                        | 2.9            | -9.0      | 3.4E-19 | 1.4E-17     |
| <i>Anaerococcus ASV #1</i>    | ae7cf0f32080cf5e62b3fbd903a997af | 16.5      | -25.9                        | 3.0            | -8.7      | 2.2E-18 | 4.4E-17     |
| <i>Lawsonella ASV #1</i>      | b89dbfe5c74375ff3d4922b41c470740 | 49.0      | -7.3                         | 2.9            | -2.5      | 1.3E-02 | 5.1E-02     |
| <i>Corynebacterium ASV #2</i> | c91b64f1467982a81922d331a310f5dc | 1172.2    | -3.7                         | 1.6            | -2.2      | 2.5E-02 | 9.2E-02     |
| <i>Bacillus ASV #1</i>        | 5565e52f91bc244013249656795409ca | 18.7      | 6.9                          | 1.8            | 3.8       | 1.7E-04 | 7.7E-04     |
| <i>Staphylococcus ASV #2</i>  | b273d7d05f0525bb87418b0138d90605 | 86.0      | 11.8                         | 2.2            | 5.3       | 1.2E-07 | 6.1E-07     |
| <i>Porphyromonas ASV #1</i>   | 969732ae717bf5a9282f4781499aadb4 | 10.0      | 21.4                         | 3.0            | 7.2       | 6.3E-13 | 3.6E-12     |
| <i>Abitrophia ASV #1</i>      | afce1dc2c06acb90ad5d3da0fffbcd02 | 9.7       | 22.3                         | 2.8            | 7.9       | 3.5E-15 | 2.4E-14     |
| <i>Streptococcus ASV #1</i>   | 4481bc66d3a54f79e6abb8b557a2a104 | 19.3      | 23.2                         | 2.9            | 7.9       | 2.5E-15 | 2.4E-14     |
| <i>Staphylococcus ASV #1</i>  | 7b06c22a4ff85c9b2cbbf57a53462e13 | 41.9      | 23.4                         | 3.0            | 7.9       | 3.6E-15 | 2.4E-14     |
| <i>Corynebacterium ASV #1</i> | 0560198302010f9b110d4ec9897e14d0 | 45.9      | 24.5                         | 3.0            | 8.2       | 1.8E-16 | 2.3E-15     |

**DESeq2 Analysis of the Nasal Microbiota between the PD Group and the HC Group.** The listed ASV were determined to be significantly different using an adjusted p value of 0.10. Base Mean, mean of normalized counts for all samples. Wald stat, Wald statistic. Positive log<sub>2</sub> Fold Change is higher in the PD Group.

**SI Table 2**

| <i>Genus</i>                  | ASV                              | Base Mean | log2 Fold Change | Standard error | Wald stat | P value | Adj P value |
|-------------------------------|----------------------------------|-----------|------------------|----------------|-----------|---------|-------------|
| <i>Staphylococcus ASV #3</i>  | 0f89ba63b47f3b624c13293cb4d56486 | 16.5      | -25.6            | 2.9            | -8.8      | 1.9E-18 | 2.0E-16     |
| <i>Porphyromonas ASV #1</i>   | 969732ae717bf5a9282f4781499aadb4 | 7.4       | 21.6             | 2.9            | 7.4       | 1.1E-13 | 4.8E-12     |
| <i>Abitrophia ASV #1</i>      | afce1dc2c06acb90ad5d3da0fffbcd02 | 7.3       | 23.3             | 2.8            | 8.4       | 4.3E-17 | 3.0E-15     |
| <i>Corynebacterium ASV #3</i> | 36f00e24a741c19a5ee20f58919004ad | 12.4      | 24.0             | 2.9            | 8.2       | 1.7E-16 | 8.8E-15     |
| <i>Staphylococcus ASV #2</i>  | b273d7d05f0525bb87418b0138d90605 | 65.8      | 24.8             | 2.4            | 10.2      | 1.5E-24 | 3.1E-22     |

**DESeq2 Analysis of the Nasal Microbiota between the PD Group and the KTx Group.** The listed ASV were determined to be significantly different using an adjusted p value of 0.10. Base Mean, mean of normalized counts for all samples. Wald stat, Wald statistic. Positive log2 Fold Change is higher in the PD Group.



**SI Table 3**

| <i>Genus</i>                  | ASV                              | Base Mean | log2 Fold Change | Standard error | Wald stat | P value | Adj P value |
|-------------------------------|----------------------------------|-----------|------------------|----------------|-----------|---------|-------------|
| <i>Anaerococcus ASV #1</i>    | ae7cf0f32080cf5e62b3fbd903a997af | 12.0      | -25.4            | 3.0            | -8.5      | 2.8E-17 | 2.2E-15     |
| <i>Corynebacterium ASV #4</i> | 9f6c00ff9e1f455f42f211770d60dec0 | 11.2      | -25.3            | 3.0            | -8.4      | 3.6E-17 | 2.2E-15     |
| <i>Staphylococcus ASV #3</i>  | 0f89ba63b47f3b624c13293cb4d56486 | 12.5      | 21.6             | 3.0            | 7.2       | 7.4E-13 | 2.8E-11     |
| <i>Staphylococcus ASV #1</i>  | 7b06c22a4ff85c9b2cbbf57a53462e13 | 11.8      | 22.9             | 3.0            | 7.6       | 2.8E-14 | 1.3E-12     |
| <i>Corynebacterium ASV #1</i> | 0560198302010f9b110d4ec9897e14d0 | 237.4     | 27.1             | 3.0            | 9.0       | 2.2E-19 | 4.1E-17     |

**DESeq2 Analysis of the Nasal Microbiota between the KTx Group and the HC Group.** The listed ASV were determined to be significantly different using an adjusted p value of 0.10. Base Mean, mean of normalized counts for all samples. Wald stat, Wald statistic. Positive log2 Fold Change is higher in the KTx Group.

**SI Table 4**

| Genus                            | Age $\geq$ 65 | Age < 65 | P value | Adj P value |
|----------------------------------|---------------|----------|---------|-------------|
|                                  | n = 28        | n = 63   |         |             |
| <i>Staphylococcus</i>            | 0.187         | 0.346    | 0.11    | 0.40        |
| <i>Finegoldia</i>                | 0.000         | 0.001    | 0.11    | 0.40        |
| <i>Anaerococcus</i>              | 0.001         | 0.013    | 0.14    | 0.40        |
| <i>Moraxella</i>                 | 0.000         | 0.000    | 0.18    | 0.40        |
| <i>Unspecified Neisseriaceae</i> | 0.000         | 0.000    | 0.30    | 0.48        |
| <i>Streptococcus</i>             | 0.012         | 0.007    | 0.32    | 0.48        |
| <i>Corynebacterium</i>           | 0.124         | 0.139    | 0.56    | 0.72        |
| <i>Peptoniphilus</i>             | 0.000         | 0.000    | 0.66    | 0.74        |
| <i>Cutibacterium</i>             | 0.003         | 0.002    | 0.81    | 0.81        |

**Comparison of Nasal Microbiota Based on Patient's Age at the Genus Level.** P value was calculated between groups using Wilcoxon rank sum test. Adjusted p value (Adj P value) was calculated using Benjamini-Hochberg adjustment.

**SI Table 5**

| Genus                            | Female Sex       | Male Sex         | P value | Adj P value |
|----------------------------------|------------------|------------------|---------|-------------|
|                                  | n = 50           | n = 41           |         |             |
|                                  | Median Abundance | Median Abundance |         |             |
| <i>Peptoniphilus</i>             | 0.000            | 0.005            | 0.01    | 0.10        |
| <i>Finegoldia</i>                | 0.000            | 0.002            | 0.07    | 0.31        |
| <i>Anaerococcus</i>              | 0.002            | 0.017            | 0.19    | 0.51        |
| <i>Corynebacterium</i>           | 0.101            | 0.197            | 0.23    | 0.51        |
| <i>Cutibacterium</i>             | 0.002            | 0.007            | 0.38    | 0.64        |
| <i>Moraxella</i>                 | 0.000            | 0.000            | 0.43    | 0.64        |
| Unspecified <i>Neisseriaceae</i> | 0.000            | 0.000            | 0.90    | 0.91        |
| <i>Streptococcus</i>             | 0.008            | 0.010            | 0.90    | 0.91        |
| <i>Staphylococcus</i>            | 0.285            | 0.250            | 0.91    | 0.91        |

**Comparison of Nasal Microbiota Based on Patient's Sex at the Genus Level.** P value was calculated between groups using Wilcoxon rank sum test. Adjusted p value (Adj P value) was calculated using Benjamini-Hochberg adjustment.

**SI Table 6**

| Genus                            | KTx on TMP/SMX   | KTx off TMP/SMX  | P value | Adj P value |
|----------------------------------|------------------|------------------|---------|-------------|
|                                  | n = 12           | n = 25           |         |             |
|                                  | Median Abundance | Median Abundance |         |             |
| <i>Finegoldia</i>                | 0.000            | 0.002            | 0.02    | 0.15        |
| <i>Peptoniphilus</i>             | 0.000            | 0.000            | 0.04    | 0.15        |
| <i>Anaerococcus</i>              | 0.0002           | 0.007            | 0.06    | 0.15        |
| <i>Corynebacterium</i>           | 0.101            | 0.314            | 0.36    | 0.59        |
| <i>Cutibacterium</i>             | 0.000            | 0.000            | 0.37    | 0.59        |
| <i>Staphylococcus</i>            | 0.363            | 0.487            | 0.53    | 0.71        |
| Unspecified <i>Neisseriaceae</i> | 0.000            | 0.000            | 0.70    | 0.80        |
| <i>Streptococcus</i>             | 0.002            | 0.005            | 0.84    | 0.84        |
| <i>Moraxella</i>                 | 0.000            | 0.000            | NA      | NA          |

**Comparison of Nasal Microbiota Based on Trimethoprim/Sulfamethoxazole usage in the Kidney Transplant Recipients at the Genus Level.** P value was calculated between groups using Wilcoxon rank sum test. Adjusted p value (Adj P value) was calculated using Benjamini-Hochberg adjustment. P values with NA were unable to be calculated because the abundances were 0 in both groups. KTx, Kidney Transplant; TMP/SMX, trimethoprim/sulfamethoxazole.

**SI Table 7**

| Genus                            | PD Staph                    | PD No Staph                  | P value | Adj P value |
|----------------------------------|-----------------------------|------------------------------|---------|-------------|
|                                  | Future Peritonitis<br>n = 6 | Future Peritonitis<br>n = 26 |         |             |
|                                  | Median Abundance            | Median Abundance             |         |             |
| Unspecified <i>Neisseriaceae</i> | 0.000                       | 0.000                        | 0.08    | 0.66        |
| <i>Staphylococcus</i>            | 0.521                       | 0.240                        | 0.38    | 0.73        |
| <i>Streptococcus</i>             | 0.009                       | 0.035                        | 0.38    | 0.73        |
| <i>Anaerococcus</i>              | 0.0002                      | 0.022                        | 0.39    | 0.73        |
| <i>Peptoniphilus</i>             | 0.000                       | 0.000                        | 0.48    | 0.73        |
| <i>Cutibacterium</i>             | 0.001                       | 0.000                        | 0.55    | 0.73        |
| <i>Finegoldia</i>                | 0.000                       | 0.000                        | 0.76    | 0.87        |
| <i>Corynebacterium</i>           | 0.101                       | 0.098                        | 1.00    | 1.00        |
| <i>Moraxella</i>                 | 0.000                       | 0.000                        | NA      | NA          |

**Comparison of Nasal Microbiota Based on PD patients who developed *Staphylococcus* peritonitis status and PD patients who did not develop *Staphylococcus* peritonitis at the Genus Level.** P value was calculated between groups using Wilcoxon rank sum test. Adjusted p value (Adj P value) was calculated using Benjamini-Hochberg adjustment. P values with NA were unable to be calculated because the abundances were 0 in both groups. PD Staph peritonitis cohort was defined as PD patients who currently had *Staphylococcus* peritonitis or developed *Staphylococcus* peritonitis within 10 to 12 months (last follow up).
