# Supplementary material for: A Distinct Nasal Microbiota Signature in Peritoneal Dialysis Patients
Source: PubMed Central journal article supplement — medRxiv. 2023 Feb 24:2023.02.23.23286379. Preprint. [Version 1] doi: 10.1101/2023.02.23.23286379 (PMC9980262; doi:10.1101/2023.02.23.23286379), 2023-02-24
Supplement: NIHPP2023.02.23.23286379v1-supplement-2.pdf [file NIHPP2023.02.23.23286379v1-supplement-2.pdf]

**SI Table 1**

| Genus                         | ASV                               | Base Mean | log2 Fold Change | Standard error | Wald stat | P value | Adj P value |
|-------------------------------|-----------------------------------|-----------|------------------|----------------|-----------|---------|-------------|
| <i>Finegoldia</i> ASV #1      | 1f016ec26e4774c86f029301b556de28  | 24.3      | -26.4            | 2.9            | -9.0      | 3.4E-19 | 1.4E-17     |
| <i>Anaerococcus</i> ASV #1    | ae7cf0f32080cf5e62b3fbd903a997af  | 16.5      | -25.9            | 3.0            | -8.7      | 2.2E-18 | 4.4E-17     |
| <i>Lawsonella</i> ASV #1      | b89dbfe5c74375ff3d4922b41c470740  | 49.0      | -7.3             | 2.9            | -2.5      | 1.3E-02 | 5.1E-02     |
| <i>Corynebacterium</i> ASV #2 | c91b64f1467982a81922d331a310f5dc  | 1172.2    | -3.7             | 1.6            | -2.2      | 2.5E-02 | 9.2E-02     |
| <i>Bacillus</i> ASV #1        | 5565e52f91bc244013249656795409ca  | 18.7      | 6.9              | 1.8            | 3.8       | 1.7E-04 | 7.7E-04     |
| <i>Staphylococcus</i> ASV #2  | b273d7d05f0525bb87418b0138d90605  | 86.0      | 11.8             | 2.2            | 5.3       | 1.2E-07 | 6.1E-07     |
| <i>Porphyromonas</i> ASV #1   | 969732ae717bf5a9282f4781499aad4b4 | 10.0      | 21.4             | 3.0            | 7.2       | 6.3E-13 | 3.6E-12     |
| <i>Abitrophia</i> ASV #1      | afce1dc2c06acb90ad5d3da0fffbcd02  | 9.7       | 22.3             | 2.8            | 7.9       | 3.5E-15 | 2.4E-14     |
| <i>Streptococcus</i> ASV #1   | 4481bc66d3a54f79e6abb8b557a2a104  | 19.3      | 23.2             | 2.9            | 7.9       | 2.5E-15 | 2.4E-14     |
| <i>Staphylococcus</i> ASV #1  | 7b06c22a4ff85c9b2cbbf57a53462e13  | 41.9      | 23.4             | 3.0            | 7.9       | 3.6E-15 | 2.4E-14     |
| <i>Corynebacterium</i> ASV #1 | 0560198302010f9b110d4ec9897e14d0  | 45.9      | 24.5             | 3.0            | 8.2       | 1.8E-16 | 2.3E-15     |

**DESeq2 Analysis of the Nasal Microbiota between the PD Group and the HC Group.** The listed ASV were determined to be significantly different using an adjusted p value of 0.10. Base Mean, mean of normalized counts for all samples. Wald stat, Wald statistic. Positive log2 Fold Change is higher in the PD Group.

**SI Table 2**

| <i>Genus</i>                  | ASV                              | Base Mean | log2 Fold Change | Standard error | Wald stat | P value | Adj P value |
|-------------------------------|----------------------------------|-----------|------------------|----------------|-----------|---------|-------------|
| <i>Staphylococcus ASV #3</i>  | 0f89ba63b47f3b624c13293cb4d56486 | 16.5      | -25.6            | 2.9            | -8.8      | 1.9E-18 | 2.0E-16     |
| <i>Porphyromonas ASV #1</i>   | 969732ae717bf5a9282f4781499aadb4 | 7.4       | 21.6             | 2.9            | 7.4       | 1.1E-13 | 4.8E-12     |
| <i>Abitrophia ASV #1</i>      | afce1dc2c06acb90ad5d3da0fffbcd02 | 7.3       | 23.3             | 2.8            | 8.4       | 4.3E-17 | 3.0E-15     |
| <i>Corynebacterium ASV #3</i> | 36f00e24a741c19a5ee20f58919004ad | 12.4      | 24.0             | 2.9            | 8.2       | 1.7E-16 | 8.8E-15     |
| <i>Staphylococcus ASV #2</i>  | b273d7d05f0525bb87418b0138d90605 | 65.8      | 24.8             | 2.4            | 10.2      | 1.5E-24 | 3.1E-22     |

**DESeq2 Analysis of the Nasal Microbiota between the PD Group and the KTx Group.** The listed ASV were determined to be significantly different using an adjusted p value of 0.10. Base Mean, mean of normalized counts for all samples. Wald stat, Wald statistic. Positive log2 Fold Change is higher in the PD Group.

**SI Table 3**

| <i>Genus</i>                  | ASV                              | Base Mean | log2 Fold Change | Standard error | Wald stat | P value | Adj P value |
|-------------------------------|----------------------------------|-----------|------------------|----------------|-----------|---------|-------------|
| <i>Anaerococcus ASV #1</i>    | ae7cf0f32080cf5e62b3fbd903a997af | 12.0      | -25.4            | 3.0            | -8.5      | 2.8E-17 | 2.2E-15     |
| <i>Corynebacterium ASV #4</i> | 9f6c00ff9e1f455f42f211770d60dec0 | 11.2      | -25.3            | 3.0            | -8.4      | 3.6E-17 | 2.2E-15     |
| <i>Staphylococcus ASV #3</i>  | 0f89ba63b47f3b624c13293cb4d56486 | 12.5      | 21.6             | 3.0            | 7.2       | 7.4E-13 | 2.8E-11     |
| <i>Staphylococcus ASV #1</i>  | 7b06c22a4ff85c9b2cbbf57a53462e13 | 11.8      | 22.9             | 3.0            | 7.6       | 2.8E-14 | 1.3E-12     |
| <i>Corynebacterium ASV #1</i> | 0560198302010f9b110d4ec9897e14d0 | 237.4     | 27.1             | 3.0            | 9.0       | 2.2E-19 | 4.1E-17     |

**DESeq2 Analysis of the Nasal Microbiota between the KTx Group and the HC Group.** The listed ASV were determined to be significantly different using an adjusted p value of 0.10. Base Mean, mean of normalized counts for all samples. Wald stat, Wald statistic. Positive log2 Fold Change is higher in the KTx Group.

**SI Table 4**

| Genus                            | Age $\geq$ 65 | Age < 65 | P value | Adj P value |
|----------------------------------|---------------|----------|---------|-------------|
|                                  | n = 28        | n = 63   |         |             |
| <i>Staphylococcus</i>            | 0.187         | 0.346    | 0.11    | 0.40        |
| <i>Finegoldia</i>                | 0.000         | 0.001    | 0.11    | 0.40        |
| <i>Anaerococcus</i>              | 0.001         | 0.013    | 0.14    | 0.40        |
| <i>Moraxella</i>                 | 0.000         | 0.000    | 0.18    | 0.40        |
| <i>Unspecified Neisseriaceae</i> | 0.000         | 0.000    | 0.30    | 0.48        |
| <i>Streptococcus</i>             | 0.012         | 0.007    | 0.32    | 0.48        |
| <i>Corynebacterium</i>           | 0.124         | 0.139    | 0.56    | 0.72        |
| <i>Peptoniphilus</i>             | 0.000         | 0.000    | 0.66    | 0.74        |
| <i>Cutibacterium</i>             | 0.003         | 0.002    | 0.81    | 0.81        |

**Comparison of Nasal Microbiota Based on Patient's Age at the Genus Level.** P value was calculated between groups using Wilcoxon rank sum test. Adjusted p value (Adj P value) was calculated using Benjamini-Hochberg adjustment.

**SI Table 5**

| Genus                            | Female Sex       | Male Sex         | P value | Adj P value |
|----------------------------------|------------------|------------------|---------|-------------|
|                                  | n = 50           | n = 41           |         |             |
|                                  | Median Abundance | Median Abundance |         |             |
| <i>Peptoniphilus</i>             | 0.000            | 0.005            | 0.01    | 0.10        |
| <i>Finegoldia</i>                | 0.000            | 0.002            | 0.07    | 0.31        |
| <i>Anaerococcus</i>              | 0.002            | 0.017            | 0.19    | 0.51        |
| <i>Corynebacterium</i>           | 0.101            | 0.197            | 0.23    | 0.51        |
| <i>Cutibacterium</i>             | 0.002            | 0.007            | 0.38    | 0.64        |
| <i>Moraxella</i>                 | 0.000            | 0.000            | 0.43    | 0.64        |
| Unspecified <i>Neisseriaceae</i> | 0.000            | 0.000            | 0.90    | 0.91        |
| <i>Streptococcus</i>             | 0.008            | 0.010            | 0.90    | 0.91        |
| <i>Staphylococcus</i>            | 0.285            | 0.250            | 0.91    | 0.91        |

**Comparison of Nasal Microbiota Based on Patient's Sex at the Genus Level.** P value was calculated between groups using Wilcoxon rank sum test. Adjusted p value (Adj P value) was calculated using Benjamini-Hochberg adjustment.

**SI Table 6**

| Genus                            | KTx on TMP/SMX   | KTx off TMP/SMX  | P value | Adj P value |
|----------------------------------|------------------|------------------|---------|-------------|
|                                  | n = 12           | n = 25           |         |             |
|                                  | Median Abundance | Median Abundance |         |             |
| <i>Finegoldia</i>                | 0.000            | 0.002            | 0.02    | 0.15        |
| <i>Peptoniphilus</i>             | 0.000            | 0.000            | 0.04    | 0.15        |
| <i>Anaerococcus</i>              | 0.0002           | 0.007            | 0.06    | 0.15        |
| <i>Corynebacterium</i>           | 0.101            | 0.314            | 0.36    | 0.59        |
| <i>Cutibacterium</i>             | 0.000            | 0.000            | 0.37    | 0.59        |
| <i>Staphylococcus</i>            | 0.363            | 0.487            | 0.53    | 0.71        |
| Unspecified <i>Neisseriaceae</i> | 0.000            | 0.000            | 0.70    | 0.80        |
| <i>Streptococcus</i>             | 0.002            | 0.005            | 0.84    | 0.84        |
| <i>Moraxella</i>                 | 0.000            | 0.000            | NA      | NA          |

**Comparison of Nasal Microbiota Based on Trimethoprim/Sulfamethoxazole usage in the Kidney Transplant Recipients at the Genus Level.** P value was calculated between groups using Wilcoxon rank sum test. Adjusted p value (Adj P value) was calculated using Benjamini-Hochberg adjustment. P values with NA were unable to be calculated because the abundances were 0 in both groups. KTx, Kidney Transplant; TMP/SMX, trimethoprim/sulfamethoxazole.

**SI Table 7**

| Genus                            | PD Staph                    | PD No Staph                  | P value | Adj P value |
|----------------------------------|-----------------------------|------------------------------|---------|-------------|
|                                  | Future Peritonitis<br>n = 6 | Future Peritonitis<br>n = 26 |         |             |
|                                  | Median Abundance            | Median Abundance             |         |             |
| Unspecified <i>Neisseriaceae</i> | 0.000                       | 0.000                        | 0.08    | 0.66        |
| <i>Staphylococcus</i>            | 0.521                       | 0.240                        | 0.38    | 0.73        |
| <i>Streptococcus</i>             | 0.009                       | 0.035                        | 0.38    | 0.73        |
| <i>Anaerococcus</i>              | 0.0002                      | 0.022                        | 0.39    | 0.73        |
| <i>Peptoniphilus</i>             | 0.000                       | 0.000                        | 0.48    | 0.73        |
| <i>Cutibacterium</i>             | 0.001                       | 0.000                        | 0.55    | 0.73        |
| <i>Finegoldia</i>                | 0.000                       | 0.000                        | 0.76    | 0.87        |
| <i>Corynebacterium</i>           | 0.101                       | 0.098                        | 1.00    | 1.00        |
| <i>Moraxella</i>                 | 0.000                       | 0.000                        | NA      | NA          |

**Comparison of Nasal Microbiota Based on PD patients who developed *Staphylococcus* peritonitis status and PD patients who did not develop *Staphylococcus* peritonitis at the Genus Level.** P value was calculated between groups using Wilcoxon rank sum test. Adjusted p value (Adj P value) was calculated using Benjamini-Hochberg adjustment. P values with NA were unable to be calculated because the abundances were 0 in both groups. PD Staph peritonitis cohort was defined as PD patients who currently had *Staphylococcus* peritonitis or developed *Staphylococcus* peritonitis within 10 to 12 months (last follow up).
